1 **Full Title**

2 Microtubule Defect Involved in 'Mitophagy Resistance' Under Subacute  
3 Oxidative Stress - Potential Mechanism for Cellular Inflammation

4

5 **Short Title**

6 Microtubule Defect Involved in 'Mitophagy Resistance' Under Subacute  
7 Oxidative Stress

8

9 **Author names and affiliations**

10 Takahiko Tamura<sup>1,2</sup>, M.D., Ph.D. Nobuo Yasuda<sup>1</sup>, Ph.D. Tomoharu Shakuo<sup>1</sup>,  
11 M.D., Ph.D. Aki Kashiwagi<sup>1</sup>, M.D., Ph.D. Jeevendra A, J, Martyn<sup>1</sup>, M.D., Ph.D.  
12 Masataka Yokoyama<sup>2</sup>, M.D., Ph.D. Shingo Yasuhara<sup>1</sup> M.D., Ph.D.

13

14 1. Department of Anesthesia, Critical Care and Pain Medicine

15 Shriners Hospitals for Children Boston, Massachusetts General Hospital and

16 Harvard Medical School. 51 Blossom Street, Boston, MA 02114, USA

17 2. Department of Anesthesiology and Intensive Care Medicine

18 Kochi Medical School. Oko-cho Kohasu, Nankoku, Kochi, 7838508, Japan

19

20 **Corresponding Author**

21 Shingo Yasuhara

22 51 Blossom Street, Boston, MA 02114

23 Phone number: (617)314-5109

24 Email address: [syasuhara@mgh.harvard.edu](mailto:syasuhara@mgh.harvard.edu)

25

26 **Author contributions**

27 Takahiko Tamura: Data Curation, Formal Analysis, Investigation, Methodology,

28 Visualization, Writing-Original Draft Preparation

29 Nobuo Yasuda: Data Curation, Formal Analysis, Investigation, Methodology,

30 Visualization

31 Tomoharu Shakuo: Data Curation, Investigation, Methodology

32 Aki Kashiwagi: Data Curation, Investigation, Methodology

33 Jeevendra A, J, Martyn: Finding Acquisition, Project Administration, Resources,

34 Supervision, Writing-Review & Editing

35 Masataka Yokoyama: Finding Acquisition, Project Administration, Supervision

- 36 Shingo Yasuhara: Conceptualization, Finding Acquisition, Methodology, Project  
Administration, Resources, Software, Supervision, Writing-Review & Editing
- 37 Administration, Resources, Software, Supervision, Writing-Review & Editing

38 **[Abstract]**

39 **Introduction:** Oxidative stress is considered an essential mechanism in  
40 ICU-acquired weakness. The roles of oxidative stress in autophagy/mitophagy  
41 dysfunction remains elusive. Microtubule serves as an essential guide rail for  
42 auto/mitophagosome trafficking required for proper maturation of  
43 auto/mitophagosomes in normal circumstances, and microtubules network  
44 formation is regulated by signal transduction mechanisms involving Akt, GSK3 $\beta$ ,  
45 and the microtubule plus-end tracking molecule, EB1. We have investigated (1)  
46 whether oxidative stress affects this pathway, leading to the defective mitophagy  
47 response, and (2) whether trehalose, an auto/mitophagy modulator, can  
48 ameliorate these pathological conditions.

49 **Methods:** By stably transfecting markers for auto/mitophagy or MT synthesis,  
50 we have established a few new C2C12 myocyte cell lines, expressing, GFP-LC3,  
51 EB1-GFP, and/or tandem-fluorescence LC3 (tfLC3). To monitor microtubule  
52 network, the cells were stained by SiR-tubulin. The cells were cultured in the  
53 presence or absence of oxidative stress by hydrogen peroxide (H<sub>2</sub>O<sub>2</sub>) and  
54 treated with or without trehalose. The response of mitophagy parameters  
55 including vesicle motion and the maturation status was monitored by stimulating

56 the cells with carbonyl cyanide m-chlorophenyl hydrazone (CCCP), an  
57 established mitophagy inducer, under a time-lapse confocal microscopy. Signal  
58 transduction mechanisms linking mitophagy to microtubule formation was  
59 analyzed by Western Blotting against Akt and GSK3 $\beta$ .

60 **Results:** Cells under the oxidative stress, showed abolished MT network  
61 formation, decreased microtubule synthesis by EB1, and a decrease in  
62 CCCP-invoked response of mitophagosome motion, perturbed mitophagosome  
63 maturation, and increased superoxide production. Signal resistance of  
64 Akt/GSK3 $\beta$  pathway to mitophagic stimulation, was documented. Trehalose  
65 treatment reversed signal resistance, diminished MT synthesis, ameliorated the  
66 disturbed MT network, and improved maturation defects, suppressing the  
67 production of superoxide.

68 **Conclusions:** Oxidative stress decreases the response of mitophagy and  
69 abolishes microtubule network. Trehalose improves the synthetic ability of  
70 microtubule and normalized the disturbed microtubule network, resulting in the  
71 improvement of the perturbed mitophagosomes maturation under the oxidative  
72 stress.

73

74 **[Keywords]**

75 Muscle weakness, ICU-acquired weakness, Autophagy, Mitophagy, Oxidative

76 stress, Microtubule, Akt, GSK3 $\beta$ , Trehalose, Mitochondria

77 **[Introduction]**

78 Muscle wasting and muscle weakness is one of the major complications among  
79 many types of critical illnesses including sepsis, burn, and major trauma [1]. In  
80 critical illnesses, muscle wasting occurs mostly in chronic phase. More recently,  
81 however, ICU- acquired weakness (ICU-AW), which occurs rapidly in the  
82 critically ill patients, has acquired both scientific and clinical attention in the field  
83 of critical illness studies [2] and the onset of muscle wasting/dysfunction is  
84 regarded to develop at relatively earlier stage of the disease than previously  
85 considered. When the disease persists, the muscle wasting and weakness  
86 arising from these illnesses lead to prolonged mechanical ventilation [3], with  
87 increased morbidity and mortality [4]. Oxidative stress and mitochondria  
88 dysfunctions are considered one of the key mechanisms in sepsis or burn  
89 injury-induced organ dysfunctions, and in ICU-AW. [5,6]

90 Mitochondrial dysfunction has been reported to occur concomitantly in  
91 many forms of muscle dysfunctions in critical illnesses. Perturbation of  
92 mitochondrial network integrity and their functions leads to systemic catabolism,  
93 affecting adenosine triphosphate (ATP) production, decreased organelle  
94 biogenesis, elevated proteolysis and often resulting in the loss of muscle size [2].

95 In addition to their roles in bioenergetic homeostasis, mitochondria are involved  
96 in various signal transduction. Dysregulation of these signals lead to cellular  
97 malfunction directly or indirectly. Damaged mitochondria release catastrophic  
98 mediators including reactive oxygen species (ROS), cytochrome-c, which can  
99 initiate the process of cell death and induce proteolysis [7]. Mitochondrial quality  
100 control is therefore essential not only for energy homeostasis but also in the  
101 determination of cell fate.

102 Autophagy is a cellular housekeeping system that mediates either bulk  
103 removal of cellular components or selective degradation of damaged organelles  
104 and protein aggregates [8]. Its defect or derangement in signals is associated  
105 with pathogenesis of various diseases such as cancer, neurodegeneration,  
106 metabolic diseases and multiple organ failure of critically illness [9]. Autophagy  
107 plays an essential role in the skeletal muscle system, maintaining muscle fiber  
108 integrity [10]. Dysregulation of autophagy [5,11] has been associated with the  
109 development of ICU-AW, or muscle wasting syndrome in critical illnesses, but  
110 the precise pathophysiological mechanism has remained elusive. Particularly,  
111 damaged mitochondria are removed by a form of selective autophagic  
112 degradation, or mitophagy. Mitophagy thus plays essential roles of cellular and



113 mitochondrial homeostasis, but the causative relationship with muscle wasting  
114 and mitophagy has not been fully clarified in critical illness-induced muscle  
115 dysfunctions or ICU-AW despite the reports of mitochondrial dysfunctions. [12]

116           The relationship between oxidative stress and auto/mitophagy has been  
117 studied intensively mostly with the conclusion that oxidative stress, mediated by  
118 ROS, activates auto/mitophagy [13,14]. Given that auto/mitophagy are cell  
119 protective systems acquired by eukaryotes during evolution [8,15], findings  
120 about ROS activating auto/mitophagy is rational. The cells need to adapt to  
121 acute stress by reinforcing auto/mitophagy. In this context, however, the effect of  
122 oxidative stress on the basal level of, (but not the responsiveness or  
123 competency of), auto/mitophagy, has been the focus of study [16]. The effect of  
124 prolonged oxidative stress on the 'response', or competency, of auto/mitophagy  
125 has not been investigated in detail. Clinically, it has been recognized that  
126 competency of various organs for stress adaptation is diminished in many  
127 chronic inflammatory diseases or in critical illnesses. [17,18] In this setting, it can  
128 be advocated that examining the competency of, but not just the basal level of,  
129 auto/mitophagy, is critical to fully understand the pathological symptoms of many  
130 diseases. This study, therefore, focused on the analyses of the capability of cells

131 for turning mitophagy flux, in response to mitophagy-inducing stimulation and  
132 investigated how oxidative stress affects this response. Herein, by focusing on  
133 the response of mitophagy, a new disease entity of compromised response to  
134 mitophagy-inducing stimuli ('resistance to mitophagic stimuli', or operationally  
135 simplified as 'mitophagy resistance') will be discussed. Similar to insulin  
136 resistance in type 2 diabetes mellitus (T2DM) or in chronic illnesses, we have  
137 noted there is a pathological condition where signal response for mitophagy flux  
138 turnover is defective, thus yielding poor response to mitophagy-invoking stimuli  
139 and thus resulting in decompensated quality control of mitochondria and in  
140 diminished safety margin in the homeostasis of mitochondria. [19,20]

141 Furthermore, despite the intensive studies about the relationship  
142 between ROS and auto/mitophagy, the molecular target of ROS in  
143 auto/mitophagy pathway remained somewhat elusive [16]. Previous studies tried  
144 to link ROS signal to pathways for activating the basal level of auto/mitophagy  
145 signals [13,21], but studies for explaining the link between the ROS and the  
146 responsiveness of auto/mitophagy have been limited. Microtubule (MT)s are  
147 hollow cytoskeletal rods with a diameter of approximately 25nm, and their  
148 network is maintained by a dynamic equilibrium, via constantly undergoing

149 assembly and disassembly to fulfill cellular needs. They function both to  
150 determine cell morphology and participate in a variety of cell locomotion, the  
151 intracellular transport of organelles, and the separation of chromosomes during  
152 mitosis. Accumulating numbers of recent studies demonstrated that MT serves  
153 as an essential guide rail for auto/mitophagosome vesicle trafficking and thus  
154 are the key component of auto/mitophagy pathway [22]. The roles of MTs in  
155 auto/mitophagy dysregulation, however, have less been investigated especially  
156 in the context of diseases. In this study, we analyzed whether MTs and its  
157 regulation are affected by oxidative stress and how it leads to the defective  
158 mitophagy response.

159         There have been attempts of therapeutic approaches by stimulating the  
160 autophagy in disease models where defects of autophagy and/or mitophagy is  
161 reported. Many of these approaches are aimed at activating the upstream  
162 autophagy initiating mechanisms. However, there has been no discussion  
163 regarding the validity of stimulating the upstream event where the downstream  
164 can be defective and thus the flux potentially be blocked due to the disease. The  
165 difficulty in such discussion derives partly due to the elusiveness of  
166 pathophysiology of auto/mitophagy defect in many diseases. In this study, after

167 evaluating the flux blockade of mitophagy response, the efficacy of a  
168 non-conventional auto/mitophagy modulator is examined. Trehalose, a  
169 non-reducing disaccharide composed of two D-glucose units linked  $\alpha$ -1,1, is  
170 present in many organisms, including bacteria, fungi, plants, yeast, and  
171 invertebrates including tardigrades and brine shrimps. These organisms use  
172 trehalose to augment their adaptation competency against extremely severe  
173 environmental conditions including frigidity, dehydration, starvation, and  
174 UV-radiation. [23,24] Supplementation with trehalose also improves the survival  
175 of mammalian cells [25,26]. Recent studies demonstrated that trehalose induces  
176 autophagy via mammalian (mechanistic) target of rapamycin  
177 (mTOR)-independent pathway [27,28]. Some studies have suggested that  
178 trehalose helps maintain MT-forming function of tubulins [29]. By employing the  
179 cell-protective and autophagy-augmenting proficiency of trehalose, therapeutic  
180 studies have been proposed to treat several diseases in which autophagy plays  
181 an important role [9]. This study therefore examined whether normalizing the  
182 disturbed MTs with trehalose can prevent the mitophagy dysfunction under the  
183 subacute oxidative stress.

184

185 **[Materials and Methods]**

186 ***Ethics Statement and Animal Research***

187 There is no animal research involved in the current study.

188

189 ***Reagents, Transgene Plasmid Constructs, Antibodies***

190 The reagents used in this study are; MitoSOX (Thermo Fisher Scientific),

191 LysoTracker (Thermo Fisher Scientific), SiR-tubulin (Cytoskeleton), CCCP

192 (Millipore Sigma), E64d (Millipore Sigma), pepstatin A (Millipore Sigma),

193 Lipofectamine 3000 (Thermo Fisher Scientific), G418 (Millipore Sigma),

194 Mammalian expression plasmids for GFP-LC3 (kindly provided by Dr. N.

195 Mizushima), tandem-fluorescent LC3 (Addgene), GFP-EB1 (Addgene),

196 antibodies against LC3 (Sigma), phospho-Akt (Ser473, Cell Signaling

197 Technology, #9271), phospho-GSK3 $\beta$  (Ser9, Cell Signaling Technology, #9322),

198 Anti-GAPDH (#9484 abcam, #2275-PC-100 Trevigen)

199

200 ***Cell Culture and Staining***

201 C2C12 murine myocytes were obtained from ATCC and maintained in DMEM

202 (Gibco/Thermo Fisher Scientific) with 10% fetal bovine serum (ATCC) and

203 50U/mL penicillin-streptomycin (Gibco/Thermo Fisher Scientific). By stably  
204 transfecting auto/mitophagy markers in C2C12 myocyte, new muscle cell lines  
205 were established, expressing GFP-LC3 or EB1-GFP or tflc3.

206

### 207 ***Stable Transfection***

208 Mammalian expression transgene constructs were transfected into C2C12 cells  
209 by lipofection using Lipofectamine 3000 according to the manufacturer's  
210 instructions. After 24 hours of transfection, stable transfectants were selected  
211 using G418 selection for one week and fluorescently labeled cells were cloned  
212 according to the method described previously [30].

213

### 214 ***Drug Treatment, Mitophagy Induction, and Oxidative stress***

215 To impose subacute oxidative stress, myocytes were exposed to 500 $\mu$ M of  
216 hydrogen peroxide (H<sub>2</sub>O<sub>2</sub>) for 12-18 hours. To test the therapeutic efficacy of  
217 trehalose, the cells were treated with or without 100 $\mu$ M trehalose for 2 hours  
218 before the observation. To monitor the response of mitophagy, the cells were  
219 stimulated with 5 $\mu$ M carbonyl cyanide m-chlorophenyl hydrazone (CCCP), an

220 established mitophagy inducer. To disrupt microtubule network, the cells were  
221 treated with 5 $\mu$ M colchicine for 1 hour.

222

### 223 ***Cell Staining***

224 To monitor lysosomes, the cells were stained by LysoTracker Blue. To observe  
225 microtubule, the C2C12 myocyte were stained by SiR-tubulin. To investigate the  
226 superoxide production from mitochondria, the C2C12 cells were stained by  
227 MitoSOX at 5 $\mu$ M.

228

### 229 ***Image Data Analysis***

230 For detailed time-lapse image analyses, C2C12 cells were observed using a  
231 confocal microscopy (Nikon Eclipse, A1R HD) with a 2 second interval, and the  
232 captured images were analyzed by Image J. To investigate the mechanism of  
233 the beneficial function of trehalose on MT, the synthesis speed of MT was  
234 monitored using EB1-GFP, the plus-end tracking reporter. To investigate the  
235 mitophagy response induced by CCCP, the motion and maturation of  
236 mitophagosome were monitored. The vesicle motion was measured by using the  
237 tracking plugins of ImageJ. The maturation of mitophagosome was defied by the

238 ratio of RFP/GFP. To measure fluorescent light intensity, a wide-field fluorescent  
239 microscope (Nikon Eclipse 800) calibrated with a standard fluorescent beads  
240 (LinearFlow, Thermo Fisher)

241

#### 242 ***Cell Experiment Procedure for Western Blot***

243 The C2C12 cells were cultured on 6cm dishes to 80-90% confluence. Cells were  
244 serum starved, treated with or without oxidative stress by using 500 $\mu$ M H<sub>2</sub>O<sub>2</sub> for  
245 12-18 hours. After that, the cells were treated with or without 100 $\mu$ M trehalose  
246 for 2 hours. The response of mitophagy was monitored by stimulating the cells  
247 with 5 $\mu$ M CCCP.

248

#### 249 ***Cell Homogenization***

250 Cell samples were frozen under liquid nitrogen and homogenized in ice-cold  
251 homogenization buffer (50 mM HEPES-NaOH, pH 7.5, 150 mM NaCl, 2 mM  
252 EDTA, 1% Nonidet P-40, 10% glycerol, 10 mM sodium fluoride, 2 mM sodium  
253 vanadate, 1 mM phenylmethyl- sulfonyl fluoride, 10 mM sodium pyrophosphate,  
254 10  $\mu$ g/ml aprotinin, and 10  $\mu$ g/ml leupeptin). The homogenized samples were



255 centrifuged at 13000 rcf for 30 min. Aliquots of supernatant containing same

256 amounts of protein, determined by BCA protein assay method.

257

### 258 ***Western Blot***

259 Cell homogenates containing equal amounts of protein were subjected to 10%

260 SDS-PAGE after the addition of sample buffer and boiling for 3 min. After being

261 transferred electrophoretically to nitrocellulose membrane (Li-COR, Lincoln, NE),

262 the membranes were blocked in 5% skim milk for 1 h at room temperature,

263 followed by incubation with primary antibodies for overnight at 4°C.

264 Anti-phospho-Akt (p-Akt), anti-phospho-GSK-3 $\beta$  (p- GSK-3 $\beta$ ), anti-GAPDH (Cell

265 Signaling, Beverly, MA), anti-LC3 (Sigma Aldrich, St Louis, MO) antibodies were

266 used as primary antibodies. The anti-rabbit or -mouse IgG antibody was used as

267 a secondary antibody at a dilution of 1:10,000. Bands of interest were scanned

268 and quantified with the use of Odyssey CLx (Li-COR, Lincoln, NE).

269

### 270 ***Statistical Analysis***

271 Data are expressed as mean  $\pm$  standard deviation (SD) and analyzed with

272 Student's t-test for two-group comparison, one-way ANOVA and Tukey's

273 method for more than three-group comparison. A value of  $p < 0.05$  was

274 considered significant.

275

276 **[Results]**

277 ***Subacute Oxidative Stress-Induced Perturbation in Mitophagy Response***

278 To investigate the non-acute effect of oxidative stress on the responsiveness of

279 mitophagy, C2C12 cells were treated with  $H_2O_2$  for 16 hours. Cells were then

280 stimulated by CCCP to induce mitophagy in the presence or absence of

281 auto/mitophagy flux blockade with E64d and pepstatin A. Purified mitochondria

282 fraction was analyzed for mitophagy induction by Western Blotting against LC3.

283 As shown in Fig.1,  $H_2O_2$  treatment elevated the basal level of mitophagy, but

284 when CCCP-stimulated response of mitophagy was compared between controls

285 ( $H_2O_2$  -) and the oxidative stress group ( $H_2O_2$  +), mitophagy flux was significantly

286 blocked, indicating that prolonged exposure to oxidative stress confers signal

287 resistance to mitophagic stimulation in C2C12 cells.

288

289 Figure 1: Mitophagy flux response to CCCP stimulation is diminished under

290 oxidative stress.

291 (a-d) Western blotting pictures either of the mitochondrial fraction (a, b) or the  
292 input of total homogenate (c) are shown. C2C12 myocytes were cultured in the  
293 absence ("H<sub>2</sub>O<sub>2</sub> -") or presence ("H<sub>2</sub>O<sub>2</sub>+") of hydrogen peroxide for 18 hours.  
294 Cells were stimulated by CCCP and the response of mitophagy was monitored  
295 with or without mitophagy flux blockade by E64d plus pepstatin A ("E&A-" vs.  
296 "E&A+"). Shown in the WB pictures are; (a) blotting against LC3, the  
297 auto/mitophagy marker in the mitochondrial fraction, (b) mitochondrial residual  
298 molecule, Tom20, as an internal control for equal mitochondrial protein load, and  
299 (c) GAPDH in the total homogenate as the input loading control for fractionation.  
300 (d) Quantification of the band intensity is shown as the ratio of LC3II/Tom20 in  
301 the mitochondrial fraction. Despite the tendency of increased basal level of  
302 mitophagy under oxidative stress without mitophagy stimulation, (H<sub>2</sub>O<sub>2</sub>+, CCCP-,  
303 E&A-), mitophagy flux is diminished (increment from E&A - to E&A+) under the  
304 oxidative stress (H<sub>2</sub>O<sub>2</sub>+), as compared to that in the control group (H<sub>2</sub>O<sub>2</sub>-). (e)  
305 The ratio of increase in the LC3II/Tom20 before and after the flux blockade is  
306 shown. \*: p<0.05, N=4. Data are shown as average +/- standard deviation.  
307 Note that in the mitochondrial fraction for LC3 (a), LC3II form is predominantly  
308 detected, because this form mainly consists of the vesicle attached form.

309

310 ***The Effect of Oxidative Stress on Mitophagy Motion and Its Maturation***

311 To further investigate the mechanisms involved in the disturbed mitophagy  
312 response by CCCP under oxidative stress conditions, the movement of  
313 mitophagosome was monitored by time-lapse confocal microscopy, using  
314 C2C12 cells expressing GFP-LC3. In cells under the subacute oxidative stress,  
315 the movement of mitophagosomes invoked by CCCP decreased significantly  
316 than that in the control cells (Fig.2, Supplementary Video 1), consistent with the  
317 data for the decreased mitophagy flux under CCCP stimulation in Fig.1.  
318 Trehalose, however, ameliorated the once diminished movement of  
319 mitophagosomes under the subacute oxidative stress (Fig.2, Supplementary  
320 Video 1). The increment of mitophagosome motion in response to CCCP was  
321 significantly improved by trehalose treatment under the subacute oxidative  
322 stress (132 vs. 100%: with vs. without trehalose;  $p < 0.05$ ).

323 To investigate the impact of decreased motion of mitophagosomes due  
324 to oxidative stress on the mitophagy flux, C2C12 cells expressing  
325 tandem-fluorescent LC3 (tflLC3) were monitored for analyzing the maturation  
326 status and thus flux of mitophagy after CCCP stimulation. As is shown in Fig.3,

327 tfLC3-expressing cells under the oxidative stress harbored more yellow dots  
328 (GFP and RFP both positive) as compared to red-only predominant pattern in  
329 controls, demonstrating the inhibition of mitophagosomes maturation under  
330 oxidative stress conditions. Note that tfLC3 reporter provides fluorescent signal  
331 of both GFP and RFP and thus yield yellow signal when autophagosomes and  
332 mitophagosomes are premature. During the process of maturation,  
333 autophagosomes and mitophagosomes fuse with lysosomes, and due to the  
334 drop of intravesicular pH, GFP signal fades, resulting in red-dominant signal.  
335 This finding of defective maturation supports the decreased mitophagy flux  
336 under the oxidative stress (Fig.1). Trehalose treatment, however, improved ratio  
337 of yellow to red mitophagosomes, and ameliorated the defective maturation  
338 under the subacute oxidative stress. Next, to further decipher the mechanism of  
339 the beneficial effect of trehalose, colchicine , a drug that destabilizes microtubule,  
340 was added to the treatment. Colchicine abolished the effect of trehalose on  
341 mitophagy maturation (Fig.3), suggesting that beneficial effect of trehalose is  
342 likely mediated by its effect on normalization of microtubules.  
343  
344 Figure2. The mitophagy movement is diminished under oxidative stress.

345 (Top) (a-c) Confocal microscopic images of C2C12 cells expressing GFP-LC3,  
346 co-stained with LysoTracker Blue. Pseudo colors are added with green for  
347 GFP-LC3, and red for LysoTracker Blue. (a) In controls, GFP-LC3 dots are fine  
348 granular and show vigorous movement. (b) In H<sub>2</sub>O<sub>2</sub> treated cells, GFP-LC3  
349 vesicles are swollen and the motions diminished. (c) Trehalose treatment  
350 partially reverts the size of GFP-LC3 dots and reactivates the vesicle motion.  
351 White scale bar at the right bottom corner of each image represents 10µm. (d)  
352 The movement of mitophagosomes was analyzed by ImageJ and shown as the  
353 average value of area with standard deviation (N=3-8). \*:p<0.05 by ANOVA with  
354 Tukey's comparison. For video information, refer to Supplementary Video 1.  
355  
356 Supplementary Video 1: Time-lapse confocal video image of C2C12 myocytes  
357 expressing GFP-LC3, stained by LysoTracker Blue.  
358 Live video information for Fig.2 is shown here.  
359 Cells are incubated in the presence or absence of H<sub>2</sub>O<sub>2</sub> with or without trehalose  
360 treatment. In controls (H<sub>2</sub>O<sub>2</sub> -, trehalose -, far left), GFP-LC3 dots are fine  
361 granular and show vigorous movement. In H<sub>2</sub>O<sub>2</sub> treated cells without treatment  
362 (H<sub>2</sub>O<sub>2</sub> +, trehalose -, middle), GFP-LC3 vesicles are swollen and the motions

363 markedly diminished. Trehalose treatment ( $H_2O_2$  +, trehalose +, far right)  
364 partially reverts the size of GFP-LC3 dots and reactivates the vesicle motion.  
365 Yellowish dots represent the mature vesicles after LC3-GFP dot (green) fuses  
366 with lysosomes (red), and also shows similar pattern of motion changes. In this  
367 video, pseudo colors are added with green for GFP-LC3, and red for  
368 LysoTracker Blue.  
369  
370 Figure3. The mitophagosome maturation is disturbed under oxidative stress.  
371 (Top) (a-h) Confocal microscopic images of C2C12 cells expressing tf-LC3 are  
372 shown to document the effect of  $H_2O_2$  and Trehalose on the maturation of  
373 mitophagosomes after CCCP stimulation (GFP Green, RFP; Red). (a,e) Control  
374 group, (b,f)  $H_2O_2$  group, (c,g)  $H_2O_2$  +trehalose group, (d,h)  $H_2O_2$  +trehalose  
375 +colchicine group. Scale bar represents 10 $\mu$ m.  
376 (i) The maturation status of mitophagosomes was analyzed by ImageJ and  
377 shown as the average value of the ratio of areas of GFP/RFP with the standard  
378 deviation (N=12). \*:p<0.05, ‡:p<0.05 vs colchicine group by ANOVA with  
379 Tukey's comparison.  
380

381 ***The Effect of Oxidative Stress on Microtubule Network Formation***

382 Next, to investigate the roles of MT network in the regulation of mitophagy in  
383 C2C12 myocytes under the oxidative stress, the MT network of C2C12 cells  
384 were stained by SiR-tubulin (Fig.4). C2C12 cells under the oxidative stress  
385 showed disturbed MT network formation as compared to normal cells,  
386 suggesting that the molecular target of oxidative stress likely involves pathways  
387 related to MT formation. In line with this finding, it has been reported that  
388 trehalose augments autophagy/mitophagy by mTOR-independent pathway [27],  
389 but its precise target has not been fully investigated. As shown above, trehalose  
390 improves the disturbed maturation process apparently through working on the  
391 MT network. The effect Trehalose treatment on MT was thus monitored using  
392 SiR-tubulin. Treatment by trehalose of cells exposed to oxidative stress  
393 ameliorated the disturbed MT network, suggesting that trehalose can work on  
394 maintaining the healthy MT network. To examine whether the signal amelioration  
395 of MTs by SiR under trehalose treatment was not due to artifact of measurement,  
396 C2C12 cells with trehalose were treated by colchicine. Treatment by colchicine  
397 abolished, further supporting that trehalose indeed helps maintain the MT  
398 network under oxidative stress condition.



399

400 Figure4. Microtubule network formation is disturbed under oxidative stress.

401 (Top) (a-d) Confocal microscopic images of C2C12 cell stained by SiR-tubulin

402 are shown for the potential effect of H<sub>2</sub>O<sub>2</sub>, trehalose and colchicine on the

403 microtubule network. (a) Control group, (b) H<sub>2</sub>O<sub>2</sub> group, (c) H<sub>2</sub>O<sub>2</sub> +trehalose

404 group, and (d) H<sub>2</sub>O<sub>2</sub> +trehalose+colchicine group. Scale bar =10μm.

405 (e) The area of SiR-tubulin was analyzed by ImageJ and shown as the average

406 value of area with standard deviation (N=7). \*:p<0.05, \*\*:p<0.05 vs colchicine

407 group by ANOVA with Tukey's comparison.

408

#### 409 ***The Effect of Oxidative Stress on the Synthesis of Microtubule***

410 To investigate the mechanism of the beneficial function of trehalose on MTs, the

411 synthesis extent and speed of microtubule was monitored by time-lapse confocal

412 microscopy, using EB1-GFP, the plus-end tracking reporter (Fig.5,

413 Supplementary Video 2). In cells under the subacute oxidative stress, the

414 movement and the number of EB1 significantly decreased as compared to

415 control cells. When cells are treated with trehalose, the diminished movement

416 and number of EB1 was significantly increased in cells under the subacute

417 oxidative stress. These results suggest that trehalose normalizes MT network in  
418 cells under oxidative stress conditions either by augmenting the MT synthesis or  
419 by inhibiting the MT degradation and thus secondarily affecting the synthesis.

420

421 Figure 5. The synthesis ability of microtubule is diminished by oxidative stress

422 (TOP) (a-c) Confocal microscopic images of C2C12 cell expressing EB1-GFP

423 are shown to analyze the effect of H<sub>2</sub>O<sub>2</sub> and trehalose on extent and speed of

424 MT synthesis. (a) Control group, (b) H<sub>2</sub>O<sub>2</sub> group, (c) H<sub>2</sub>O<sub>2</sub> +trehalose group.

425 Scale bar =10μm.

426 (d-f) Magnified images of the boxed areas in the top (a-c) shown. Synthesized

427 overlay images of ten stacked images of time-lapse observation are shown to

428 document the trajectory of EB1 motion. (d) Control group, (e) H<sub>2</sub>O<sub>2</sub> group, (f)

429 H<sub>2</sub>O<sub>2</sub> +trehalose group. Scale bar =10μm.

430 (g, h) The movement speed (g) and number (h) of EB-1 analyzed by ImageJ and

431 shown as the average value of area with standard deviation (N=5). \*:p<0.05,

432 \*\*:p<0.05 vs colchicine group by ANOVA with Tukey's comparison. For video

433 information, refer to Supplementary Video 2.

434

435 Supplementary Video 2: Time-lapse confocal video image of C2C12 myocytes  
436 expressing GFP-EB1 for measuring MT synthesis.  
437 Cells are incubated in the presence or absence of H<sub>2</sub>O<sub>2</sub> with or without trehalose  
438 treatment. In controls (H<sub>2</sub>O<sub>2</sub> -, trehalose -, far left), GFP-EB1 dots, representing  
439 the plus-end of elongating MTs, show vigorous movement with greater majority  
440 of dots trafficking in the efferent direction. In H<sub>2</sub>O<sub>2</sub> treated cells without treatment  
441 (H<sub>2</sub>O<sub>2</sub> +, trehalose -, middle), both the numbers and the speed of GFP-EB1  
442 motion are markedly decreased. Trehalose treatment (H<sub>2</sub>O<sub>2</sub> +, trehalose +, far  
443 right) partially rescues the EB1 trafficking.

444

#### 445 ***Signaling Mechanisms Involved in Disturbed Mitophagy Response***

446 Previous lines of evidence suggested the involvement of Akt/GSK3 $\beta$  signaling in  
447 CCCP-induced mitophagy [31] and in the elongation signals of MTs via EB1  
448 activation [32]. Activated Akt functions through the phosphorylation and  
449 inhibition of Glycogen Synthase Kinase-3 $\beta$  (GSK3 $\beta$ ) [33] leading to the  
450 activation of EB1-mediated MT synthesis through CLAPS2 recruitment. We first  
451 analyzed the time course of Akt/GSK3 $\beta$  phosphorylation in normal C2C12 cells  
452 in response to mitophagy-inducing stimulation (CCCP 5 $\mu$ M and 12.5 $\mu$ M) using

453 Western blot with antibodies against phosphorylated form of Akt (Ser473 p-Akt)  
454 and GSK3 $\beta$  (Ser9 p-GSK3 $\beta$ ). (Fig.6-a). Both 5 $\mu$ M and 12.5 $\mu$ M stimulation  
455 caused rapid phosphorylation of Akt and GSK3 $\beta$  peaking at 15 minutes of  
456 stimulation. Since there was no essential difference between 5 $\mu$ M and 12.5 $\mu$ M  
457 stimulation, 5 $\mu$ M stimulation was used thereafter unless otherwise stated. Next,  
458 to investigate the effect of oxidative stress on the activation of Akt/GSK3 $\beta$   
459 pathway, phosphorylation status of Akt after CCCP stimulation was monitored.  
460 Under the oxidative stress, the level of p-Akt and p-GSK3 $\beta$  was significantly  
461 decreased as compared to control cells (Fig.6-b,  $0.82\pm 0.39$  vs.  $1.6\pm 0.26$ ;  
462  $p<0.05$ ;  $n=5$ , and  $0.70\pm 0.03$  vs.  $1.17\pm 0.06$ ;  $p<0.05$ ;  $n=5$ , for p-Akt and p-GSK3 $\beta$ ,  
463 respectively). Trehalose treatment to cells exposed to oxidative stress rescued  
464 the deficient signal response of Akt/GSK3 $\beta$  in response to CCCP, as compared  
465 to that in cells without treatment (Fig.6-c).  
466  
467 Figure6. (a-c) Western blot analysis for phospho-Akt (p-Akt) and  
468 phospho-GSK3 $\beta$ (p-GSK3 $\beta$ ) in the C2C12 myocyte after carbonyl cyanide  
469 m-chlorophenyl hydrazone (CCCP) stimulation. In both p-Akt and p-GSK3 $\beta$

470 expression, CCCP treatment induced rapid phosphorylation of Akt and GSK3 $\beta$ ,  
471 peaking at 15min.

472 (d) Western blot analysis for p-Akt and p-GSK3 $\beta$  in the C2C12 myocyte with or  
473 without H<sub>2</sub>O<sub>2</sub>, trehalose. The p-Akt and p-GSK3 $\beta$  expression significantly  
474 decreased in C2C12 cells under the oxidative stress as compared to the control  
475 group (n=5, \* p<0.05). Trehalose treatment partially reversed the decreased  
476 p-Akt and p-GSK3 $\beta$  expression. The results of the GAPDH analysis are shown  
477 as an internal control.

478 (e) Western blot analysis for mitophagy response (the increase rate before and  
479 after CCCP) in the C2C12 myocyte under the oxidative stress with or without  
480 trehalose treatment. Trehalose treatment significantly ameliorated the disturbed  
481 p-Akt and p-GSK3 $\beta$  expression (n=5, \* p<0.05) under the oxidative stress. The  
482 results of the GAPDH analysis are shown as an internal control.

483

#### 484 ***Superoxide Production From Mitochondria***

485 Mitophagy is one of the major quality control systems of mitochondria that  
486 removes defective mitochondria and thus prevents ROS release from the  
487 damaged mitochondria. In line with this notion, the superoxide production from

488 mitochondria in C2C12 myocyte was analyzed as an outcome of poor mitophagy  
489 response under subacute oxidative stress using a staining dye for  
490 mitochondria-derived superoxide, MitoSOX (Fig.7). The ratio of C2C12 with  
491 elevated production of superoxide was significantly increased. Trehalose  
492 treatment significantly ameliorated the increase of superoxide production,  
493 supporting the hypothesis that amelioration of defective mitophagy by trehalose  
494 rescues the mitochondria and helps the quality control of mitochondria.

495

496 Figure7. Superoxide production from mitochondria

497 (a-c) Fluorescence microscopic images of C2C12 cells stained MitoSOX are  
498 shown to document the superoxide production from mitochondria after CCCP  
499 stimulation. (a) Control group, (b) H<sub>2</sub>O<sub>2</sub> group, and (c) H<sub>2</sub>O<sub>2</sub> +trehalose group.

500 Scale bar=1000μm.

501 (d) The ratio of C2C12 cells positively stained by MitoSOX was analyzed by  
502 ImageJ and shown as the average value of area with standard deviation (N=6).  
503 H<sub>2</sub>O<sub>2</sub> subacute stimulation increased superoxide production from mitochondria,  
504 and H<sub>2</sub>O<sub>2</sub> +trehalose ameliorated after CCCP administration. \*:p<0.05, \*\*:p<0.05  
505 vs control by ANOVA with Tukey's comparison.

506

507

508 **[Discussion]**

509 ***ROS and Mitophagy Response Defect***

510 In this study, we demonstrated that prolonged oxidative stress decreases the

511 response of mitophagy, especially at the maturation stage, possibly due to the

512 perturbed MT network formation. This is among the first detailed systematic

513 study that analyzed the mechanisms of disturbed mitophagy response, not the

514 basal level of mitophagy, in the cells exposed to an oxidative stress.

515 Furthermore, it was demonstrated that trehalose, a mTOR-independent

516 auto/mitophagy modulator, improves defective mitophagy response in myocytes

517 under the oxidative stress, ameliorating the inhibition of mitophagosomes

518 maturation, presumably by normalizing MT network formation and increasing the

519 synthetic ability of MT. The current study opens a possibility for therapeutic

520 approaches for targeting maturation defect in mitophagy response and for

521 modulating defective MT network formation in treating diseases arising from

522 prolonged oxidative stresses.

523

524 ***Oxidative Stress and Autophagy/mitophagy - Upregulation or***

525 ***Downregulation?***

526 Although the relationship between ROS and auto/mitophagy has been studied  
527 previously [16], most of the previous investigations focused on the mechanisms  
528 of ROS-induced upregulation of auto/mitophagy. In these previous studies, the  
529 basal levels of auto/mitophagy were analyzed and few studies focused on their  
530 response. Furthermore, in many of previous studies, cells or tissues were  
531 acutely stimulated for the analyses. Upregulation of auto/mitophagy in such  
532 acutely stressed cells is reasonable given that auto/mitophagy evolved as  
533 adaptive responses to the external and internal stresses. Importantly, the current  
534 finding about the defective mitophagy response is not contradictory to the  
535 previous findings for upregulated auto/mitophagy under oxidative stress. One  
536 has to take into account whether the analyses are performed to quantify the  
537 basal level of auto/mitophagy, or the changes in their responses of  
538 auto/mitophagy to stimulations. In biological systems, these two often show  
539 opposite trends. For example, in type 2 diabetes mellitus (T2DM), despite the  
540 fact that pathophysiology of many disease symptoms can be explained by  
541 insulin resistance, or the defective response of intracellular signals to insulin



542 stimulation in many organs, even though the basal level of plasma insulin is  
543 often elevated in many patients. Despite the serum insulin elevation,  
544 suppression or blockade of insulin signal would not be considered a reasonable  
545 therapeutic approach. Likewise, although many previous studies reported  
546 upregulation of the basal level of auto/mitophagy, blocking autophagy or  
547 mitophagy in oxidative stress related diseases may not provide a useful  
548 therapeutic approach, especially given that auto/mitophagy are mostly cell  
549 protective response in many situations.

550

### 551 ***Mitophagy Defect and Human Diseases Related to Oxidative Stress***

552 Mitophagy, a form of macroautophagy that selectively degrades damaged  
553 mitochondria, is considered as one of the major quality control system of  
554 mitochondria, and helps maintaining the integrity and the functions of healthy  
555 mitochondria [34]. Mitophagy defect is currently assumed to be an essential  
556 pathogenic factor in cancer, neurodegeneration, metabolic disorders, muscle  
557 atrophy, inflammation and organ failure caused by sepsis [35,36].

558           Among many other diseases, prolonged increase of oxidative stress is  
559 considered one of the key mechanisms in sepsis or burn injury induced organ

560 dysfunctions. In our experiments, subacute H<sub>2</sub>O<sub>2</sub> stimulation significantly  
561 inhibited mitophagy response, after CCCP stimulation (Fig.1,2) blocked  
562 mitophagosomes maturation (Fig.3), resulting in elevated superoxide generation  
563 from the defective mitochondria (Fig.7). These data suggest that subacute  
564 oxidative stress leads to mitophagy defect in myocyte after CCCP stimulation.  
565 Trehalose, however, improved the defects in maturation under the subacute  
566 oxidative stress (Fig.3) and thus will be a promising drug candidate for treating  
567 the mitophagy defect.

568

### 569 ***Microtubule and Mitophagy Maturation***

570 MT forms a dynamic cytoskeletal structure. Both integrity of healthy MT and the  
571 normal functions of MT-based motors have been shown essential in autophagy  
572 [22]. The centripetal movement of mature autophagosomes prior to fusion with  
573 lysosomes requires stable MT [37]. A key mechanism of auto/mitophagosome  
574 flux is the transport of auto/mitophagosomes along MTs toward lysosomes to  
575 form mature autophagolysosomes (autolysosomes) [38]. In this study,  
576 observation C2C12 cells stained by SiR-tubulin showed that the subacute  
577 oxidative stress abolished MT network formation as compared to normal cells

578 (Fig4). Observation of tfLC3-expressing cells demonstrated that the subacute  
579 oxidative stress inhibited mitophagosomes maturation (Fig3), implying that the  
580 unstable MT could be one of the important mechanisms of mitophagy defect  
581 under the subacute oxidative stress. This notion is supported by the finding that  
582 trehalose treatment ameliorated MT defect and mitigated mitophagy maturation  
583 defect but that colchicine abolished the beneficial effect of trehalose. These data  
584 suggest that MT serves as an essential guide rail for mitophagosome vesicle  
585 trafficking and thus are a key component of mitophagy pathway involved in  
586 disease conditions

587           Phosphoinositide-3-Kinase (PI3-K) and the downstream kinases Akt and  
588 GSK3 $\beta$  have recently been implicated in regulating both MT dynamics and  
589 organization [39]. Akt and GSK3 $\beta$  coordinately regulate the phosphorylation  
590 status of MT end capping molecules including CLASP2 and EB1, thus regulating  
591 their recruitment to the synthesis plus end of MTs[40]. Importantly,  
592 auto/mitophagy stimulating signal activate this pathway [31,41]. The results of  
593 Western Blot analysis showed that the subacute oxidative stress significantly  
594 decreased the pAkt and GSK3 $\beta$  expression as compared to control cells (Fig.6-b,

595 c), suggesting that subacute oxidative stress can affect MT synthesis by  
596 invoking signal resistance in PI3K/Akt/GSK3 $\beta$  pathway.

597

### 598 ***Trehalose Function as a Modulator of Mitophagy***

599 It has been established that trehalose is a modulator of auto/mitophagy pathway,  
600 augmenting these stress adaptation functions by mTOR-independent

601 mechanisms in COS-7 cells and mouse embryonic fibroblasts (MEFs) [42,43].

602 Trehalose also upregulates p62 expression and activates the autophagy flux in

603 Hepa1-6 cells and MEFs [9]. In our study, trehalose can improve the synthesis

604 ability of MT and thus ameliorates the defective MT network under the subacute

605 oxidative stress (Fig.4). Thus repaired MT network improved the oxidative

606 stress-induced inhibition of mitophagosomes maturation in trehalose treated

607 cells. Notably, colchicine, a drug that destabilizes MT, abolished the beneficial

608 effect of trehalose on mitophagy (Fig.3&4). In the detailed analyses of the signal

609 transduction mechanisms, trehalose treatment significantly increased the

610 disturbed Akt/GSK3 $\beta$  signaling in cells under the oxidative stress (Fig.6-b, c).

611 Many therapeutic approaches have been previously suggested in human

612 diseases or their murine equivalent models where auto/mitophagy are defective.

613 In many of previous studies, one of the proposed strategies was to boost  
614 auto/mitophagy. The current study suggests, however, that auto/mitophagy  
615 defect in diseases can involve maturation defect, or the blocked flux. To  
616 forcefully stimulate the upstream activation of auto/mitophagy in such condition  
617 where the downstream is blocked, (e.g. by disturbed MT network as shown in  
618 the current study), may not serve an effective therapeutic approach. Thus, the  
619 importance of finding the precise target of auto/mitophagy defect and  
620 ameliorating the perturbation, cannot be overemphasized.

621 Oxidative stress-induced MT disturbance can be a pivotal event in the  
622 critical illness-related mitochondrial dysfunction in skeletal muscles, and needs  
623 further investigation. Trehalose can ameliorate the perturbed MTs by increasing  
624 the synthetic ability of MT, and normalizing the disturbed MTs can serve a novel  
625 therapeutic agent in critical illnesses.

626

## 627 **[Conclusions]**

628 Oxidative stress decreases the response of mitophagy and abolishes MT  
629 network formation. Trehalose improves the synthetic ability of MT by increasing  
630 the number and movement of the MT plus end-capping molecule, EB1,

631 suggesting that trehalose augments MT network synthesis. Observation of  
632 tfLC3-expressing cells demonstrates that trehalose also improve the inhibition of  
633 mitophagosomes maturation under the oxidative stress. Finally, trehalose  
634 normalizes MT network formation by increasing the synthetic ability of MT. All  
635 the obtained data suggest that normalizing the disturbed MTs under oxidative  
636 stress can prevent the mitophagy dysfunction under the oxidative stress and  
637 serve a novel therapeutic target.

638

### 639 **Acknowledgements**

640 We used Shiners Morphology Core and Simches PMB Microscope Core for  
641 acquiring microscopy data, Shriners Genomics and Proteomics Core for  
642 performing biochemical analyses. We thank Daniel Fong for administrative  
643 assistance.

644 **Reference**

- 645 1. Ueki R, Liu L, Kashiwagi S, Kaneki M, Khan MA, Hirose M, Tompkins RG,  
646 Martyn JA, Yasuhara S (2016) Role of Elevated Fibrinogen in Burn-Induced  
647 Mitochondrial Dysfunction: Protective Effects of Glycyrrhizin. Shock 46:  
648 382-389.
- 649 2. Batt J, Herridge M, Dos Santos C (2017) Mechanism of ICU-acquired  
650 weakness: skeletal muscle loss in critical illness. Intensive Care Med 43:  
651 1844-1846.
- 652 3. Kraft R, Herndon DN, Finnerty CC, Shahrokhi S, Jeschke MG (2014)  
653 Occurrence of multiorgan dysfunction in pediatric burn patients: incidence  
654 and clinical outcome. Ann Surg 259: 381-387.
- 655 4. Warren DK, Shukla SJ, Olsen MA, Kollef MH, Hollenbeak CS, Cox MJ, Cohen  
656 MM, Fraser VJ (2003) Outcome and attributable cost of ventilator-associated  
657 pneumonia among intensive care unit patients in a suburban medical center.  
658 Crit Care Med 31: 1312-1317.
- 659 5. Hermans G, Van den Berghe G (2015) Clinical review: intensive care unit  
660 acquired weakness. Crit Care 19: 274.

- 661 6. Winkelman C (2010) The role of inflammation in ICU-acquired weakness. Crit  
662 Care 14: 186.
- 663 7. Romanello V, Sandri M (2015) Mitochondrial Quality Control and Muscle  
664 Mass Maintenance. Front Physiol 6: 422.
- 665 8. Ohsumi Y (2014) Historical landmarks of autophagy research. Cell Res 24:  
666 9-23.
- 667 9. Mizunoe Y, Kobayashi M, Sudo Y, Watanabe S, Yasukawa H, Natori D,  
668 Hoshino A, Negishi A, Okita N, Komatsu M, Higami Y (2018) Trehalose  
669 protects against oxidative stress by regulating the Keap1-Nrf2 and  
670 autophagy pathways. Redox Biol 15: 115-124.
- 671 10. Hosokawa S, Koseki H, Nagashima M, Maeyama Y, Yomogida K, Mehr C,  
672 Rutledge M, Greenfeld H, Kaneki M, Tompkins RG, Martyn JA, Yasuhara SE  
673 (2013) Title efficacy of phosphodiesterase 5 inhibitor on distant burn-induced  
674 muscle autophagy, microcirculation, and survival rate. Am J Physiol  
675 Endocrinol Metab 304: E922-933.
- 676 11. Masiero E, Agatea L, Mammucari C, Blaauw B, Loro E, Komatsu M, Metzger  
677 D, Reggiani C, Schiaffino S, Sandri M (2009) Autophagy is required to  
678 maintain muscle mass. Cell Metab 10: 507-515.



- 679 12. Jiroutkova K, Krajcova A, Ziak J, Fric M, Waldauf P, Dzupa V, Gojda J,  
680 Nemcova-Furstova V, Kovar J, Elkalaf M, Trnka J, Duska F (2015)  
681 Mitochondrial function in skeletal muscle of patients with protracted critical  
682 illness and ICU-acquired weakness. Crit Care 19: 448.
- 683 13. Filomeni G, Desideri E, Cardaci S, Rotilio G, Ciriolo MR (2010) Under the  
684 ROS...thiol network is the principal suspect for autophagy commitment.  
685 Autophagy 6: 999-1005.
- 686 14. Scherz-Shouval R, Elazar Z (2007) ROS, mitochondria and the regulation of  
687 autophagy. Trends Cell Biol 17: 422-427.
- 688 15. Morishita H, Mizushima N (2019) Diverse Cellular Roles of Autophagy. Annu  
689 Rev Cell Dev Biol 35: 453-475.
- 690 16. Filomeni G, De Zio D, Cecconi F (2015) Oxidative stress and autophagy: the  
691 clash between damage and metabolic needs. Cell Death Differ 22: 377-388.
- 692 17. Alberti C, Brun-Buisson C, Chevret S, Antonelli M, Goodman SV, Martin C,  
693 Moreno R, Ochagavia AR, Palazzo M, Werdan K, Le Gall JR, European  
694 Sepsis Study G (2005) Systemic inflammatory response and progression to  
695 severe sepsis in critically ill infected patients. Am J Respir Crit Care Med 171:  
696 461-468.

- 697 18. Skrupky LP, Kerby PW, Hotchkiss RS (2011) Advances in the management  
698 of sepsis and the understanding of key immunologic defects. *Anesthesiology*  
699 115: 1349-1362.
- 700 19. Ueki R, Kashiwagi A, Hirose M, Yu YM, Martyn JA, Yasuhara S (2015)  
701 Mitophagy resistance in skeletal muscles after burn injury. ABA Meeting.
- 702 20. Yasuda N, Shakuo T, Kashiwagi A, Tamura T, Kaneki M, Khan M, Martyn JA,  
703 Yasuhara S (2019) Evidence for burn-induced perturbation in mitophagic  
704 response (mitophagy resistance) based on skeletal muscle cell culture  
705 experiments. American Burn Association Annual Meeting.
- 706 21. Scherz-Shouval R, Shvets E, Elazar Z (2007) Oxidation as a  
707 post-translational modification that regulates autophagy. *Autophagy* 3:  
708 371-373.
- 709 22. Mackeh R, Perdiz D, Lorin S, Codogno P, Pous C (2013) Autophagy and  
710 microtubules - new story, old players. *J Cell Sci* 126: 1071-1080.
- 711 23. Hengherr S, Heyer AG, Kohler HR, Schill RO (2008) Trehalose and  
712 anhydrobiosis in tardigrades--evidence for divergence in responses to  
713 dehydration. *FEBS J* 275: 281-288.

- 714 24. Bradbury J (2001) Of tardigrades, trehalose, and tissue engineering. *Lancet*  
715 358: 392.
- 716 25. Campbell LH, Brockbank KG (2012) Culturing with trehalose produces viable  
717 endothelial cells after cryopreservation. *Cryobiology* 64: 240-244.
- 718 26. Eroglu A, Bailey SE, Toner M, Toth TL (2009) Successful cryopreservation of  
719 mouse oocytes by using low concentrations of trehalose and  
720 dimethylsulfoxide. *Biol Reprod* 80: 70-78.
- 721 27. Sarkar S, Davies JE, Huang Z, Tunnacliffe A, Rubinsztein DC (2007)  
722 Trehalose, a novel mTOR-independent autophagy enhancer, accelerates the  
723 clearance of mutant huntingtin and alpha-synuclein. *J Biol Chem* 282:  
724 5641-5652.
- 725 28. Tanaka M, Machida Y, Niu S, Ikeda T, Jana NR, Doi H, Kurosawa M,  
726 Nekooki M, Nukina N (2004) Trehalose alleviates polyglutamine-mediated  
727 pathology in a mouse model of Huntington disease. *Nat Med* 10: 148-154.
- 728 29. Draberova E, Sulimenko V, Sulimenko T, Bohm KJ, Draber P (2010)  
729 Recovery of tubulin functions after freeze-drying in the presence of trehalose.  
730 *Anal Biochem* 397: 67-72.

- 731 30. Sadhu DN, Lundberg MS, Burghardt RC, Ramos KS (1994) c-Ha-rasEJ  
732 transfection of rat aortic smooth muscle cells induces epidermal growth factor  
733 responsiveness and characteristics of a malignant phenotype. *J Cell Physiol*  
734 161: 490-500.
- 735 31. Soutar MPM, Kempthorne L, Miyakawa S, Annuario E, Melandri D, Harley J,  
736 O'Sullivan GA, Wray S, Hancock DC, Cookson MR, Downward J, Carlton M,  
737 Plun-Favreau H (2018) AKT signalling selectively regulates PINK1  
738 mitophagy in SHSY5Y cells and human iPSC-derived neurons. *Sci Rep* 8:  
739 8855.
- 740 32. Schmidt N, Basu S, Sladeczek S, Gatti S, van Haren J, Treves S, Pielage J,  
741 Galjart N, Brenner HR (2012) Agrin regulates CLASP2-mediated capture of  
742 microtubules at the neuromuscular junction synaptic membrane. *J Cell Biol*  
743 198: 421-437.
- 744 33. Cross DA, Alessi DR, Cohen P, Andjelkovich M, Hemmings BA (1995)  
745 Inhibition of glycogen synthase kinase-3 by insulin mediated by protein  
746 kinase B. *Nature* 378: 785-789.
- 747 34. Yin X, Xin H, Mao S, Wu G, Guo L (2019) The Role of Autophagy in Sepsis:  
748 Protection and Injury to Organs. *Front Physiol* 10: 1071.

- 749 35. Springer MZ, Macleod KF (2016) In Brief: Mitophagy: mechanisms and role  
750 in human disease. *J Pathol* 240: 253-255.
- 751 36. Thiessen SE, Derese I, Derde S, Dufour T, Pauwels L, Bekhuis Y, Pintelon I,  
752 Martinet W, Van den Berghe G, Vanhorebeek I (2017) The Role of  
753 Autophagy in Critical Illness-induced Liver Damage. *Sci Rep* 7: 14150.
- 754 37. Kast DJ, Dominguez R (2017) The Cytoskeleton-Autophagy Connection.  
755 *Curr Biol* 27: R318-R326.
- 756 38. Geeraert C, Ratier A, Pfisterer SG, Perdiz D, Cantaloube I, Rouault A,  
757 Pattingre S, Proikas-Cezanne T, Codogno P, Pous C (2010)  
758 Starvation-induced hyperacetylation of tubulin is required for the stimulation  
759 of autophagy by nutrient deprivation. *J Biol Chem* 285: 24184-24194.
- 760 39. Nehlig A, Molina A, Rodrigues-Ferreira S, Honore S, Nahmias C (2017)  
761 Regulation of end-binding protein EB1 in the control of microtubule dynamics.  
762 *Cell Mol Life Sci* 74: 2381-2393.
- 763 40. Basu S, Sladecsek S, Pemble H, Wittmann T, Slotman JA, van Cappellen W,  
764 Brenner HR, Galjart N (2014) Acetylcholine receptor (AChR) clustering is  
765 regulated both by glycogen synthase kinase 3beta (GSK3beta)-dependent  
766 phosphorylation and the level of CLIP-associated protein 2 (CLASP2)

- 767 mediating the capture of microtubule plus-ends. *J Biol Chem* 289:  
768 30857-30867.
- 769 41. Shi Y, Yan H, Frost P, Gera J, Lichtenstein A (2005) Mammalian target of  
770 rapamycin inhibitors activate the AKT kinase in multiple myeloma cells by  
771 up-regulating the insulin-like growth factor receptor/insulin receptor  
772 substrate-1/phosphatidylinositol 3-kinase cascade. *Mol Cancer Ther* 4:  
773 1533-1540.
- 774 42. Fleming A, Noda T, Yoshimori T, Rubinsztein DC (2011) Chemical  
775 modulators of autophagy as biological probes and potential therapeutics. *Nat*  
776 *Chem Biol* 7: 9-17.
- 777 43. Sarkar S (2013) Regulation of autophagy by mTOR-dependent and  
778 mTOR-independent pathways: autophagy dysfunction in neurodegenerative  
779 diseases and therapeutic application of autophagy enhancers. *Biochem Soc*  
780 *Trans* 41: 1103-1130.
- 781

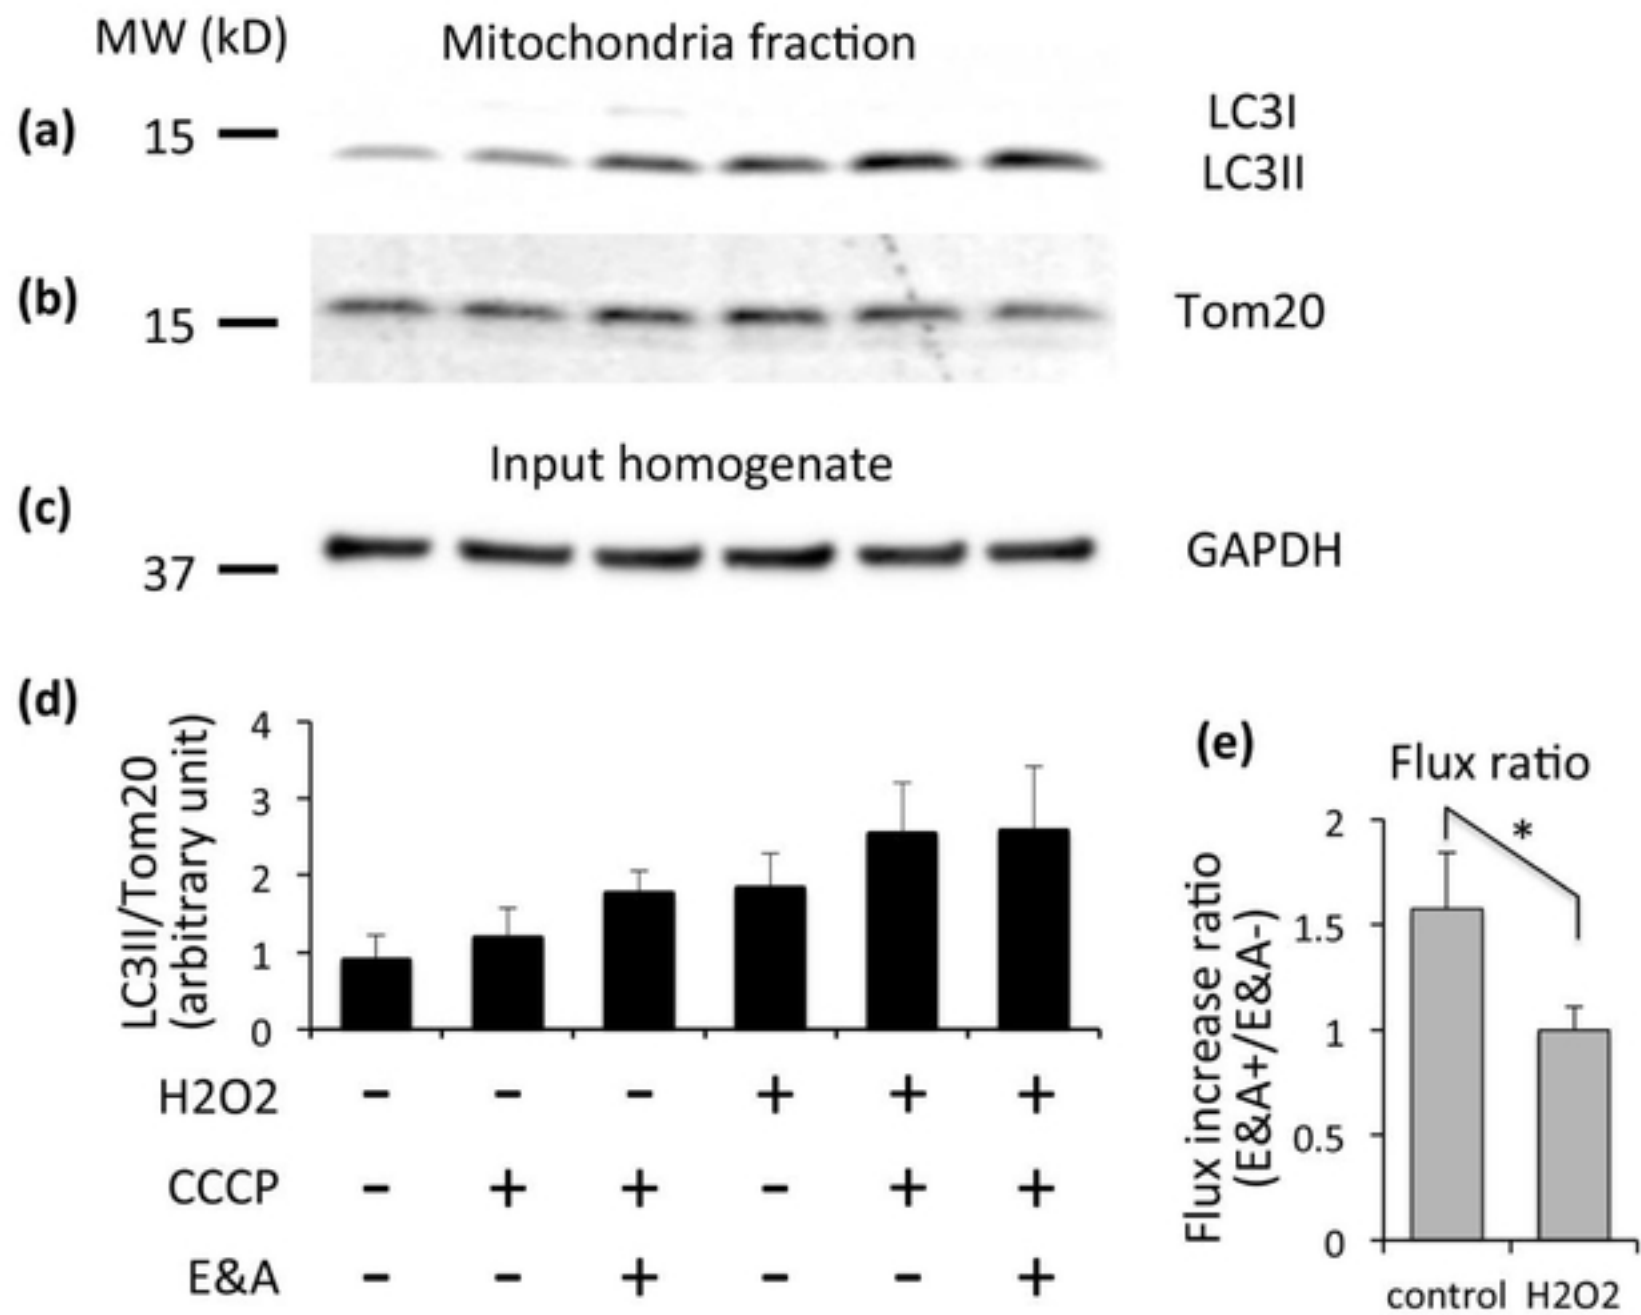

Fig1

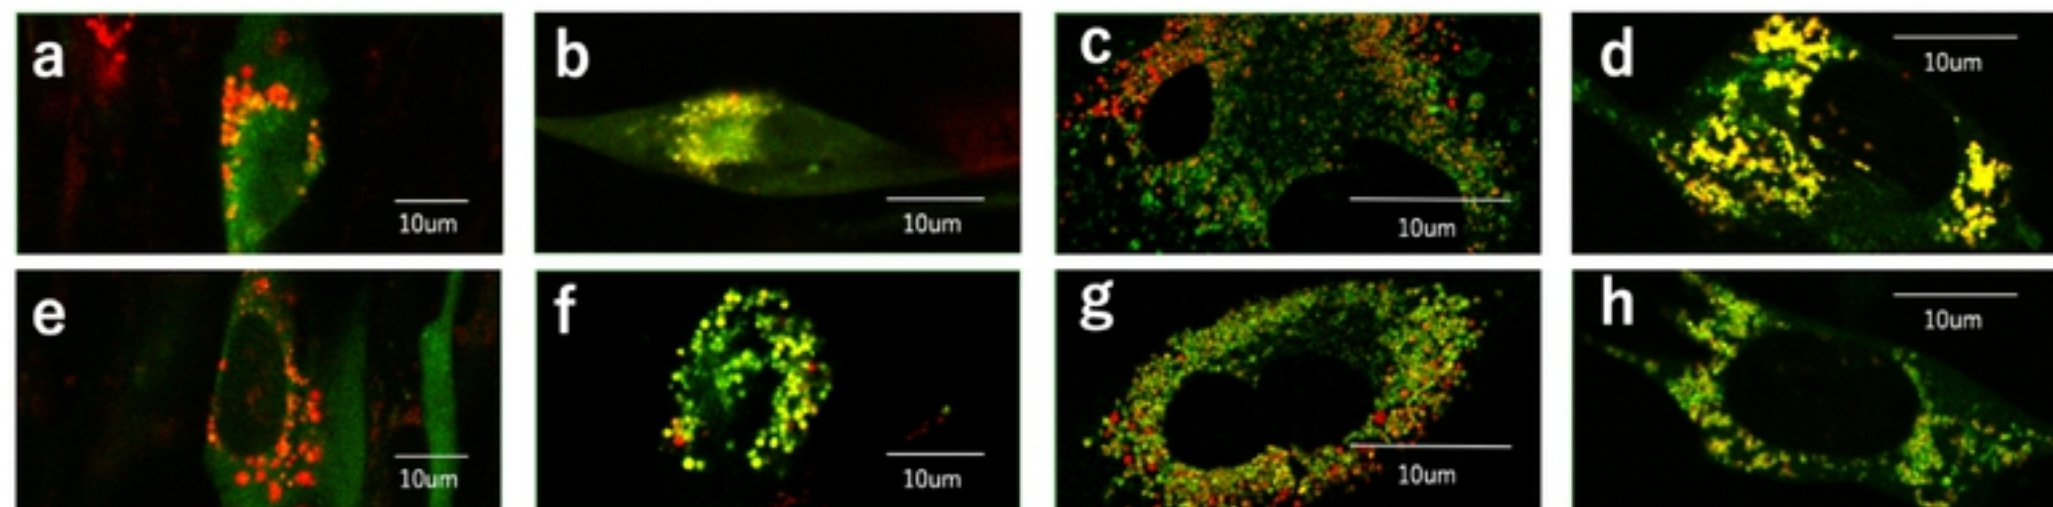

control

H<sub>2</sub>O<sub>2</sub>

H<sub>2</sub>O<sub>2</sub>  
Trehalose

H<sub>2</sub>O<sub>2</sub>  
Trehalose  
colchicine

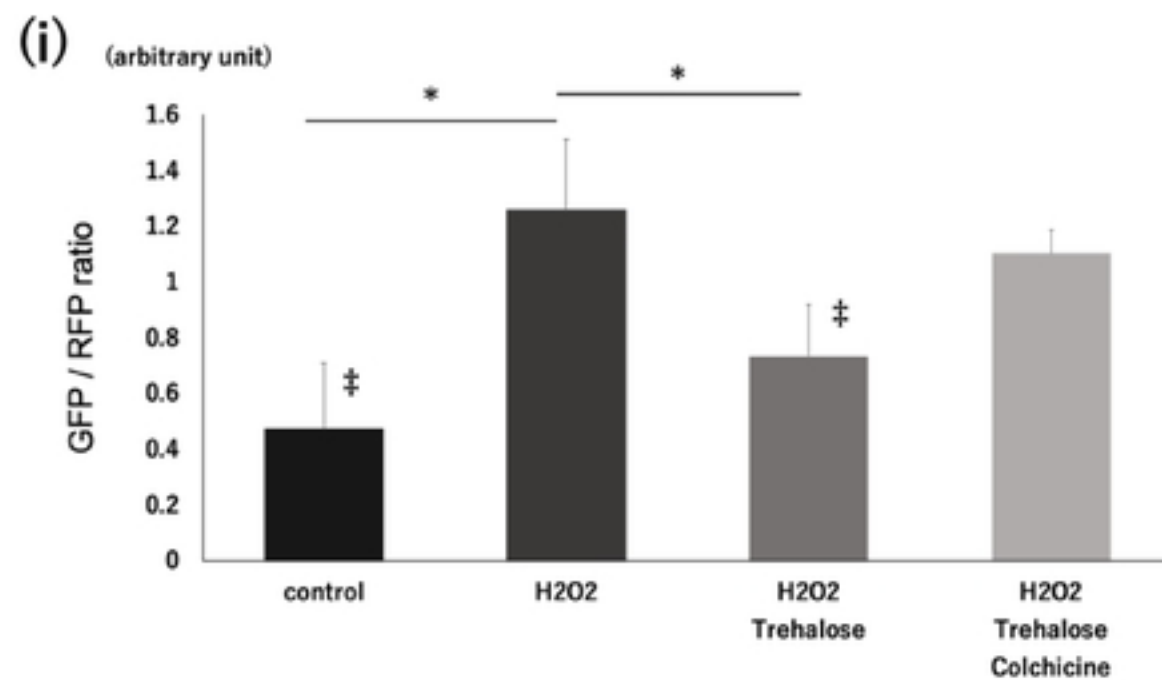

Fig3



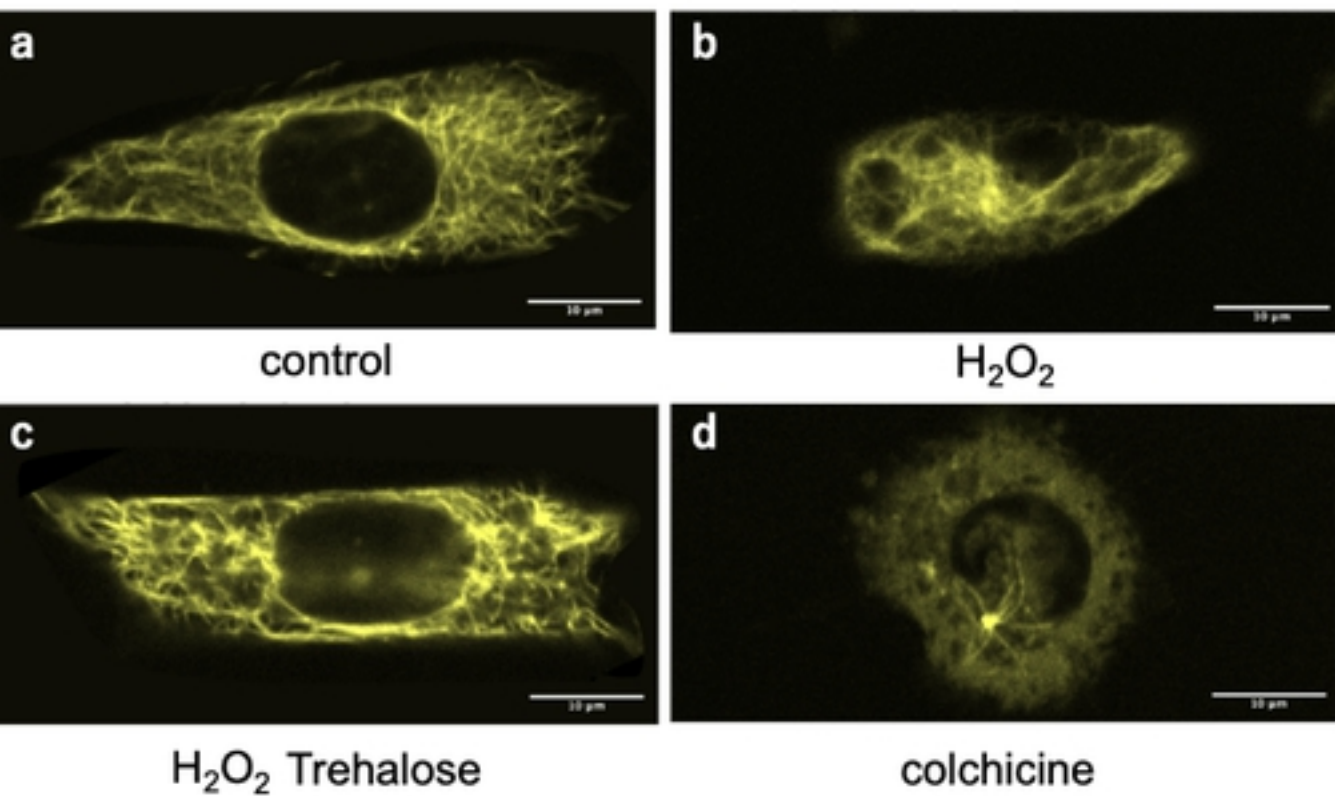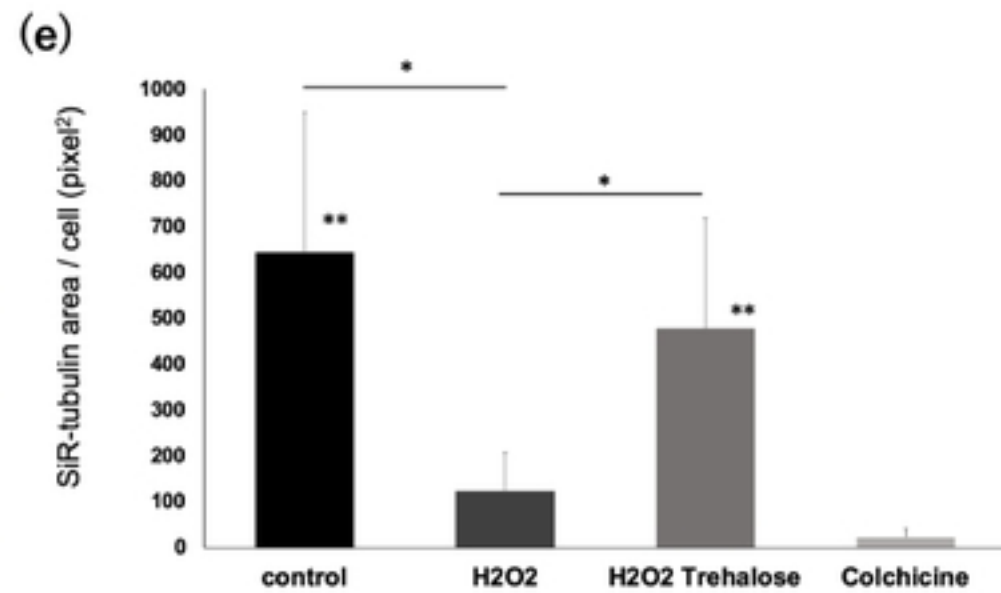

Fig4

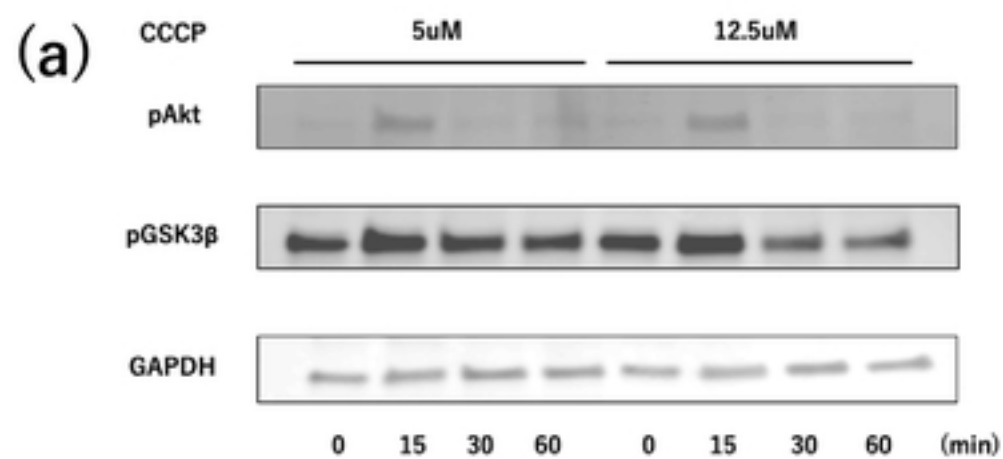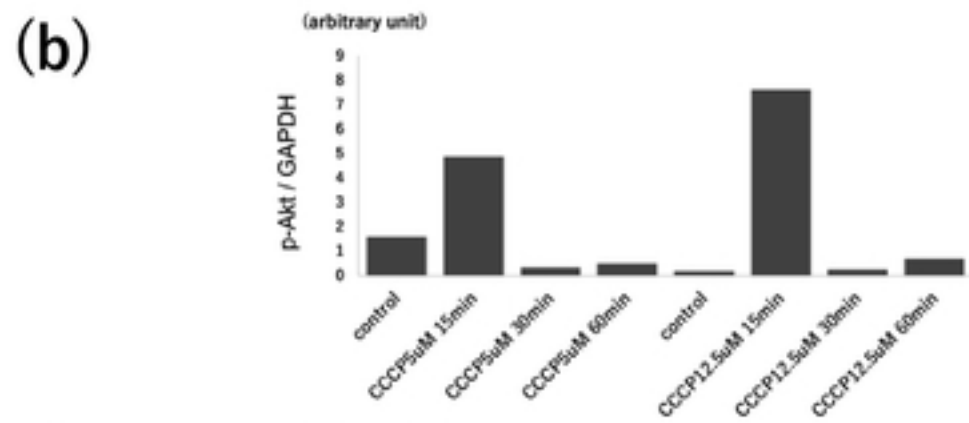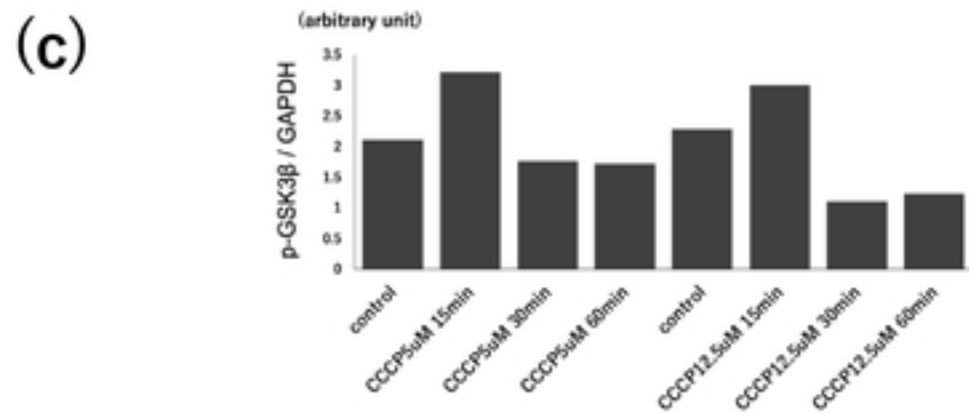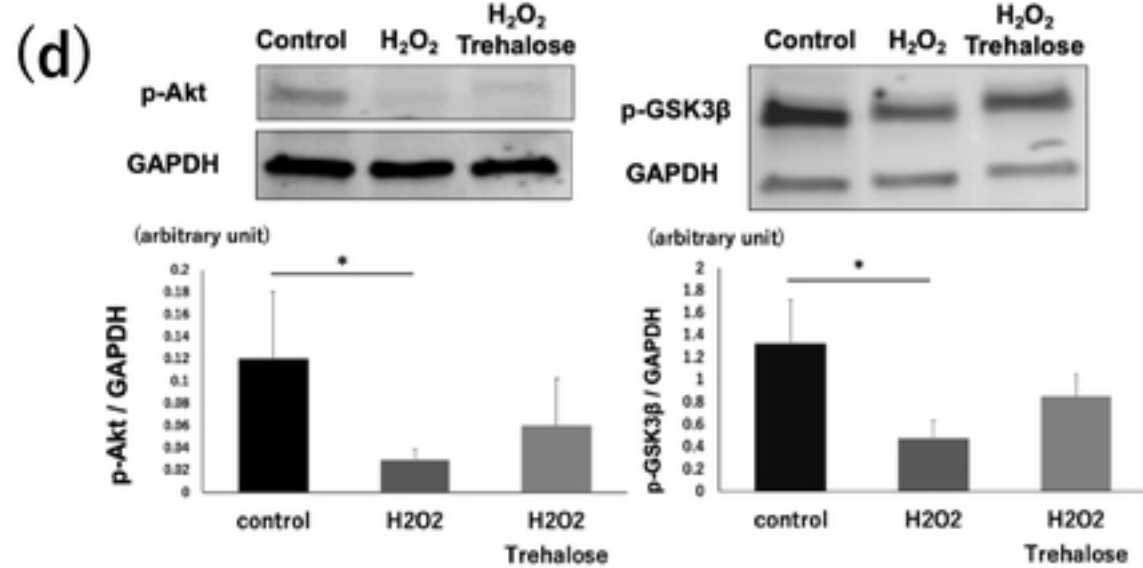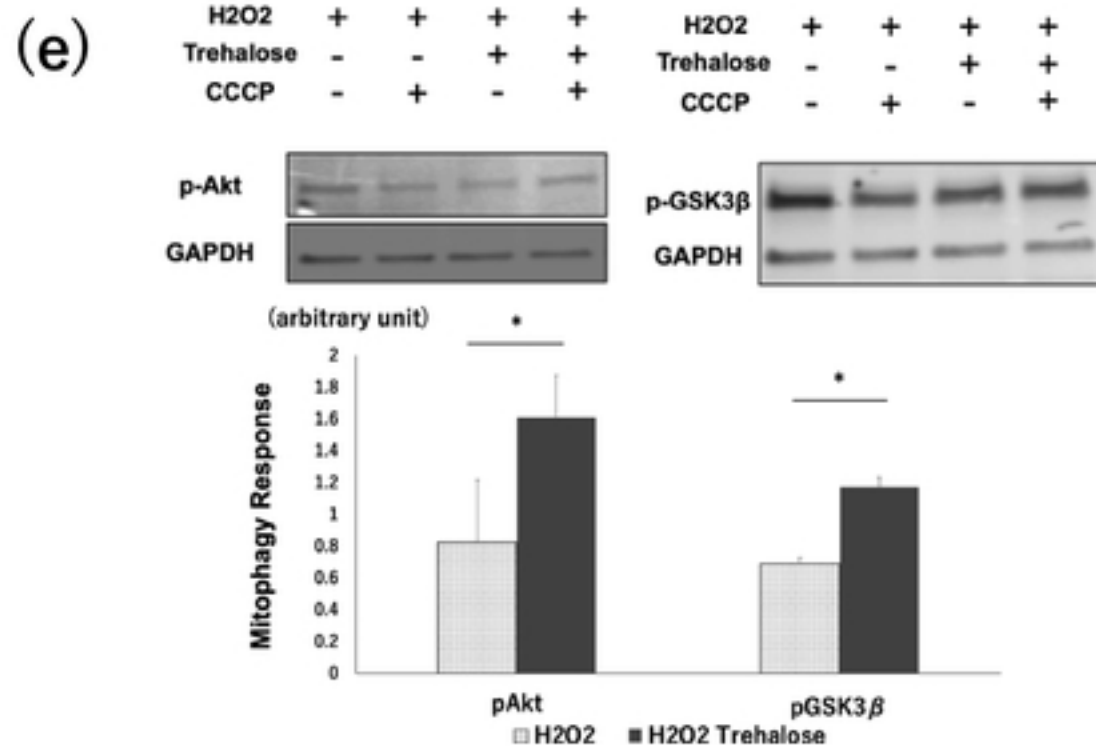

Fig6

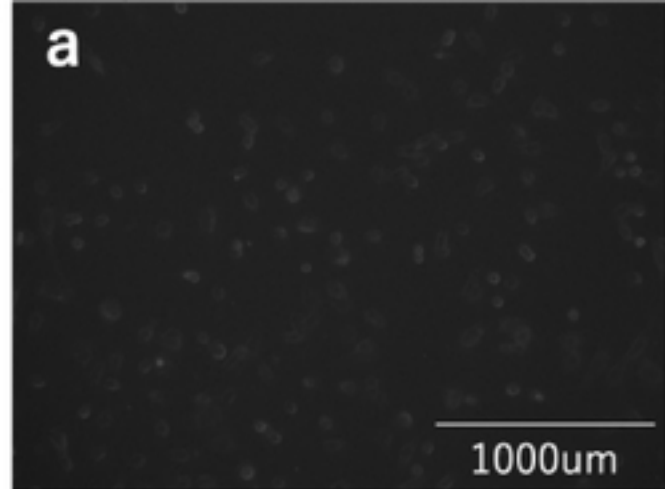

control

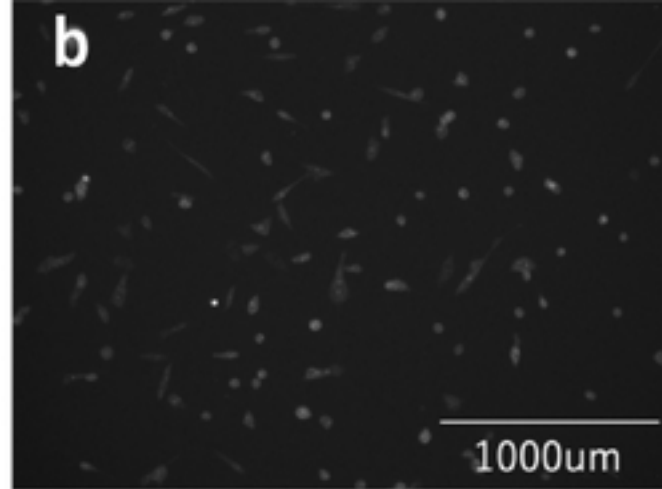

H<sub>2</sub>O<sub>2</sub>

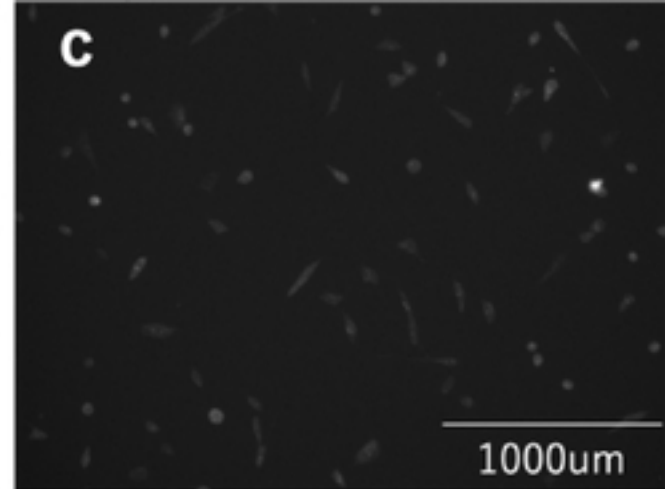

H<sub>2</sub>O<sub>2</sub> + Trehalose

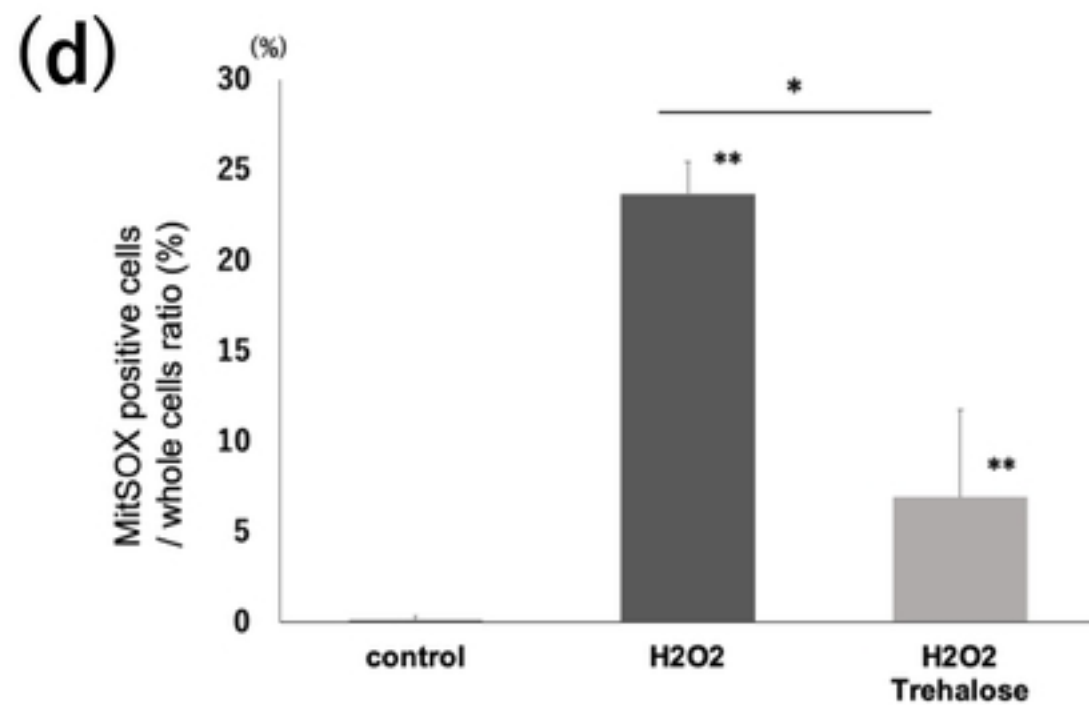

Fig7

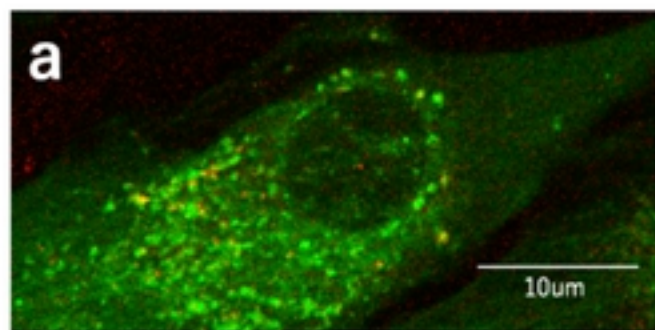

**control**

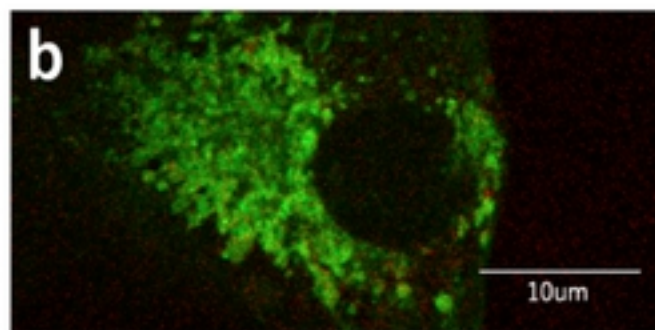

**H<sub>2</sub>O<sub>2</sub>**

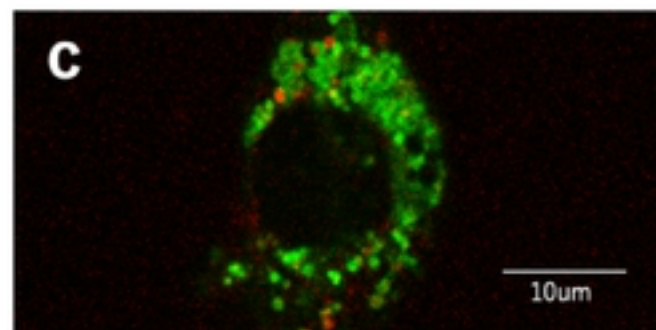

**H<sub>2</sub>O<sub>2</sub> + Trehalose**

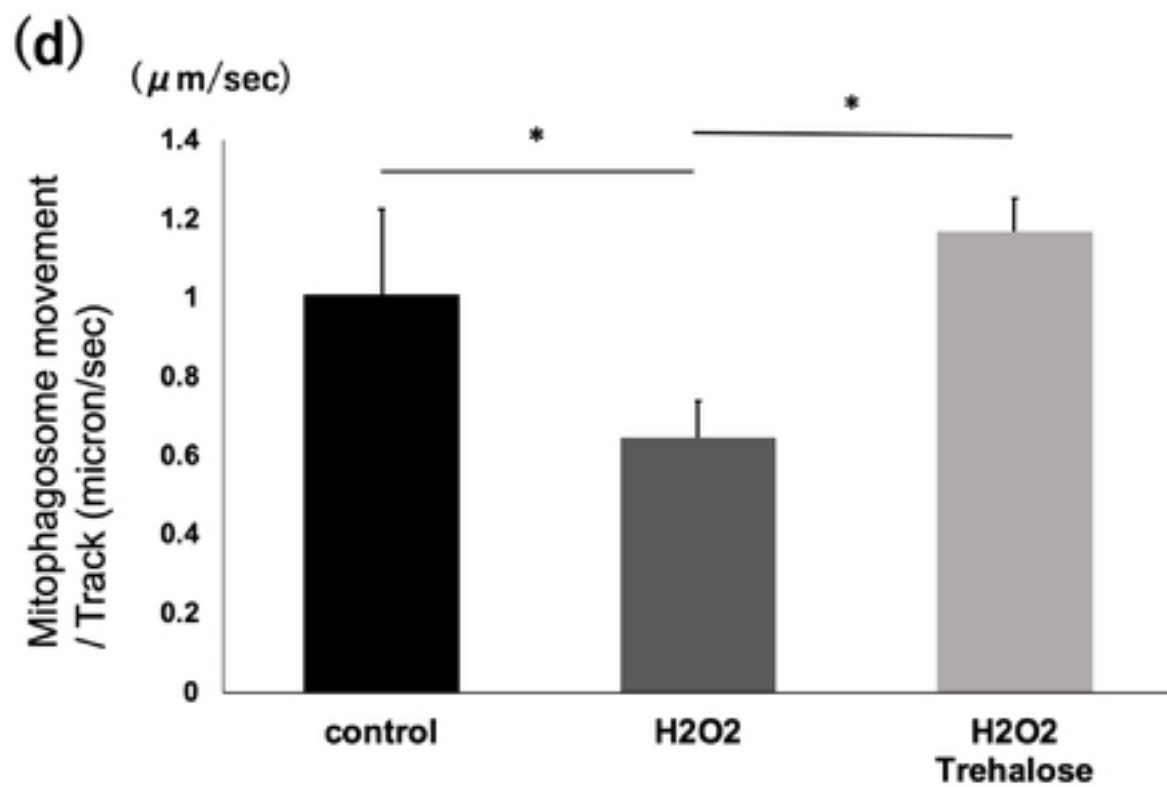

Fig2

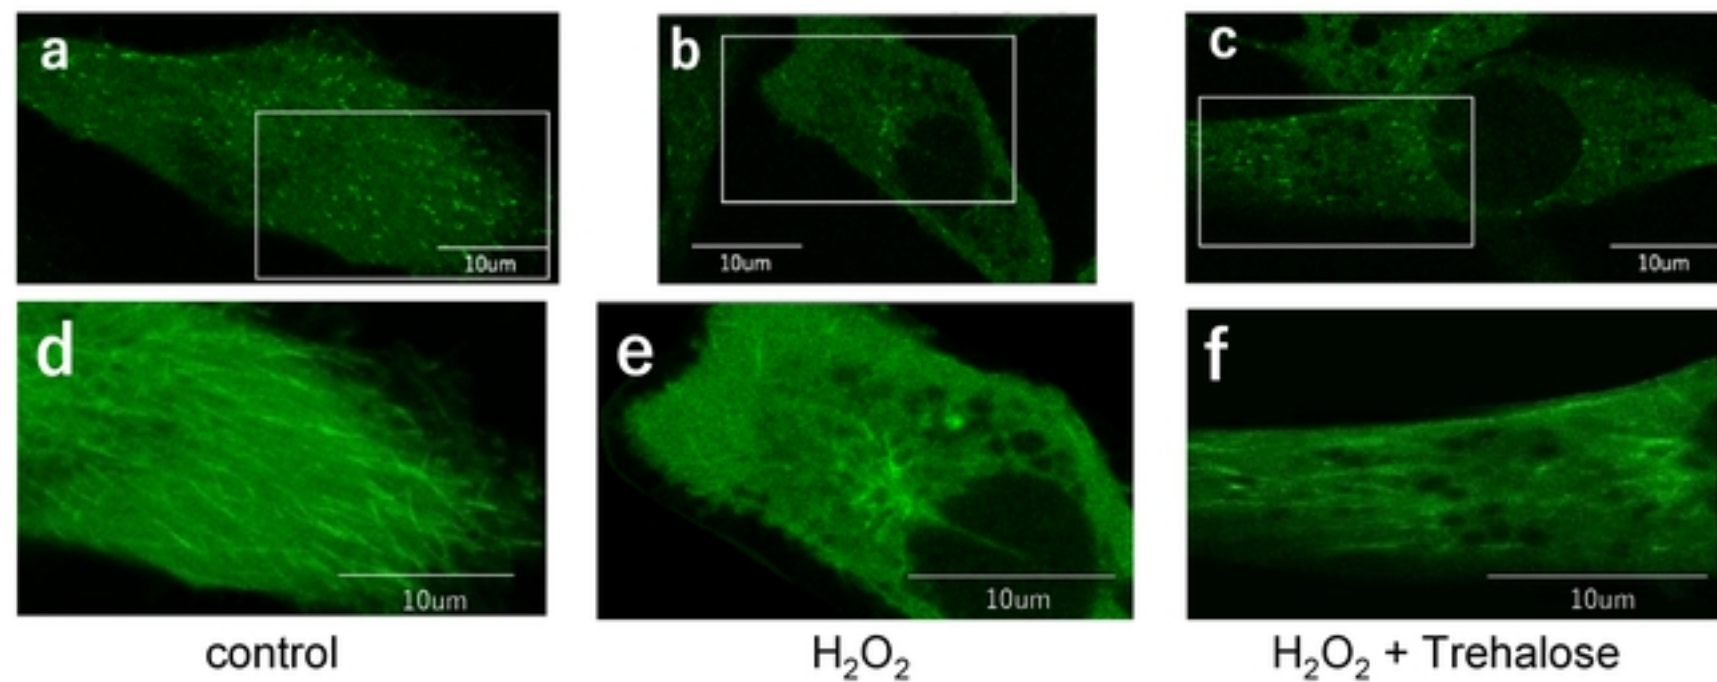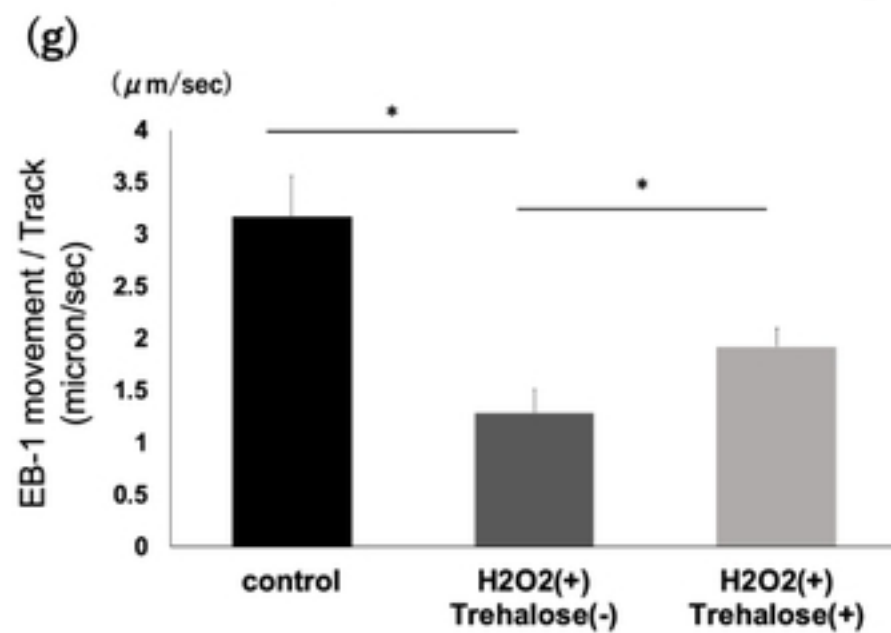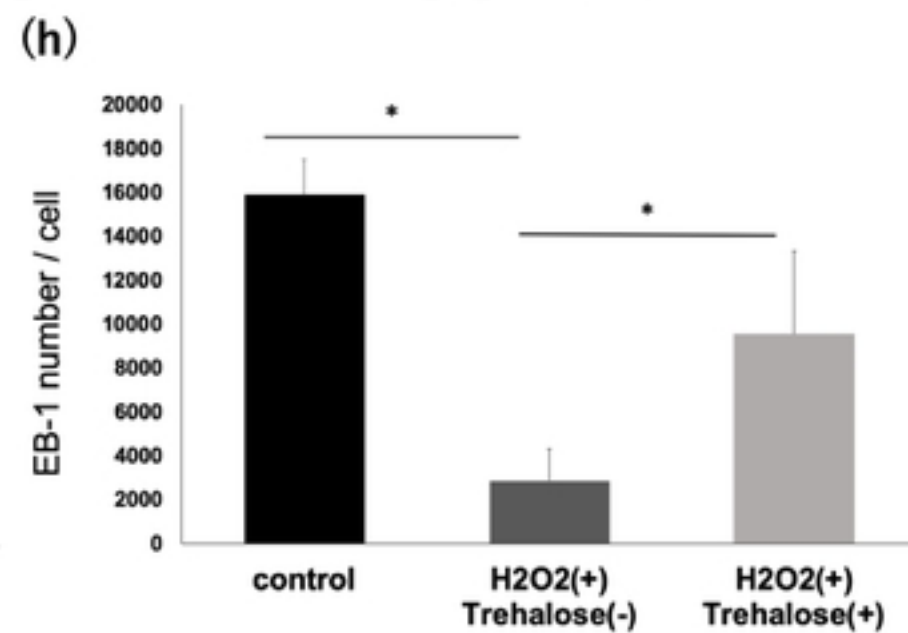

Fig5
